# Supplementary material for: EGFR/APOC1/CPT1A Axis: A Novel Pathway in Gastric Cancer Metabolism and Its Potential as a Therapeutic Target
Source: Research Square preprint supplement (doi:10.21203/rs.3.rs-5644413/v1), 2024-12-24
Supplement: Supplementary file 1 [file 4f8525aaa3fe4c0b3b31c41e.docx]

Supplementary Table 2. Primer sequences used in the study.

| **Primer name** | **Primer sequences** | |
| --- | --- | --- |
| Primers for APOC1 promoter construct: | | |
| (-2000/+100) APOC1 sense: | 5’- AGGTACCGAGCTCTTACGCGTggcaggtctcgaactcctgacctcaagtg -3’ | |
| (-1652/+100) APOC1 sense: | 5’- AGGTACCGAGCTCTTACGCGTtgttgcaatcctgccagg -3’ | |
| (-1188/+100) APOC1 sense: | 5’- AGGTACCGAGCTCTTACGCGTtacctcagcctcttgagtagct -3’ | |
| (-634/+100) APOC1 sense: | 5’- AGGTACCGAGCTCTTACGCGTagggaggagaccacccctcat -3’ | |
| Antisense: | 5’- GCTTACTTAGATCGCAGATCTgggaggtcctgtcctgcccgca -3’ | |
| Primers for APOC1 promoter site-directed mutagenesis: | | |
| binding site mutation1 sense: | 5’- gggttattactgggagCAAAAGTCTTTCCTatggccacagggacagga -3’ | |
| binding site mutation1 antisense: | 5’- ctcccagtaataaccctgtgat -3’ | |
| binding site mutation2 sense: | 5’- gggttattactgggagacccctgagggaagatgTAACACTTTacaggacaaggctgtct -3’ | |
| binding site mutation2 antisense: | 5’- ctcccagtaataaccctgtgat -3’ | |
| Primers for Apoc1 overexpression sequences: | | |
| sense: | 5’- GATTCTAGAGCTAGCGAATTCGCCACCatgaggctcttcatcgct -3’ | |
| antisense: | 5’- ATGGTCTTTGTAGTCGGATCCggagaacgtggtcttcaa -3’ | |
| Primers for Apoc1 knockdown shRNA sequences: | |  |
| sense: | 5’-ttgtggaaaggacgaggatccGCTCTTCATCGCTCTTCCTGTTTCAAGAGAACAGGAAG -3’ | |
| antisense: | 5’- tactattaataactagaattcAAAAAAGCTCTTCATCGCTCTTCCTGTTCTCTTGAAAC -3’ | |
| Primers for APOC1 overexpression sequences: | | |
| sense: | 5’- GATTCTAGAGCTAGCGAATTCGCCACCatgaggctcttcctgtcg -3’ | |
| antisense: | 5’- ATGGTCTTTGTAGTCGGATCCtgagtcaatcttgagtttctc -3’ | |
| Primers for APOC1 knockdown shRNA sequences: | | |
| sense: | 5’- ttgtggaaaggacgaggatccGACATTTCAGAAAGTGAAGGATTCAAGAGATCCTTCAC -3’ | |
| antisense: | 5’- tactattaataactagaattcAAAAAAGACATTTCAGAAAGTGAAGGATCTCTTGAATC -3’ | |
| Primers for real-time qPCR: |  | |
| APOC1 sense: | 5'- TCCAGTGCCTTGGATAAGCTG-3' | |
| APOC1 antisense: | 5'- GGCTGATGAGTTCCCGAGC-3' | |
| CPT1A sense: | 5’- TCCAGTTGGCTTATCGTGGTG-3’ | |
| CPT1A antisense: | 5’- TCCAGAGTCCGATTGATTTTTGC-3’ | |
| AP-2 sense: | 5’- AGGTCAATCTCCCTACACGAG-3’ | |
| AP-2 antisense: | 5’- GGAGTAAGGATCTTGCGACTGG-3’ | |
| GAPDH sense: | 5’- GGAGCGAGATCCCTCCAAAAT-3’ | |
| GAPDH antisense: | 5’- GGCTGTTGTCATACTTCTCATGG-3’ | |
