# Supplementary material for: EGFR/APOC1/CPT1A Axis: A Novel Pathway in Gastric Cancer Metabolism and Its Potential as a Therapeutic Target
Source: Research Square preprint supplement (doi:10.21203/rs.3.rs-5644413/v1), 2024-12-24
Supplement: Supplementary file 2 [file d61bf1ec39b63fe5096f14d1.docx]

Supplementary Table 1. RNA-seq data from the TCGA database

|  | **Gene** | **Mean Tumor TPM / Mean Normal TPM** | ***P*-value** |
| --- | --- | --- | --- |
| 1 | **APOC1** | **10.50189794** | **1.62E-12** |
| 2 | CDC6 | 10.34218129 | 8.73E-09 |
| 3 | CLDN2 | 10.78654707 | 1.62E-12 |
| 4 | COL10A1 | 237.8650015 | 0 |
| 5 | COL1A1 | 13.0348558 | 1.62E-12 |
| 6 | CST1 | 405.3281289 | 2.43E-14 |
| 7 | CTHRC1 | 16.72928317 | 1.62E-12 |
| 8 | CXCL10 | 10.85757224 | 3.71E-14 |
| 9 | CXCL9 | 13.20791712 | 0 |
| 10 | ETV4 | 10.67013095 | 1.62E-12 |
| 11 | FAP | 11.43856629 | 1.62E-12 |
| 12 | GDF15 | 10.10320033 | 1.62E-12 |
| 13 | GRIN2D | 11.77941275 | 0 |
| 14 | HOXA10 | 23.56016912 | 1.62E-12 |
| 15 | IGF2 | 9.63742253 | 0.000142992 |
| 16 | IL8 | 13.44024895 | 1.62E-12 |
| 17 | INHBA | 14.64939387 | 1.62E-12 |
| 18 | MMP11 | 29.80460249 | 1.62E-12 |
| 19 | MMP7 | 15.53790715 | 1.62E-12 |
| 20 | MSLN | 13.4279097 | 1.62E-12 |
| 21 | SDS | 10.16837866 | 0 |
| 22 | SFRP4 | 11.3720072 | 0 |
| 23 | SPP1 | 21.7713876 | 1.93E-13 |
| 24 | TREM2 | 10.73775019 | 1.62E-12 |
| 25 | UBD | 9.694555997 | 0 |
