# Supplementary material for: EGFR/APOC1/CPT1A Axis: A Novel Pathway in Gastric Cancer Metabolism and Its Potential as a Therapeutic Target
Source: Research Square preprint supplement (doi:10.21203/rs.3.rs-5644413/v1), 2024-12-24
Supplement: Supplementary file 3 [file da8ab00a57908c178434b05f.docx]

Supplementary Table 3. List of genes differentially expressed in MKN28-oeAPOC1 versus MKN28-Vector cells using a human oxidative stress PCR Array

| **Target Name** | **MKN28-oeAPOC1/**  **MKN28-Vector** |
| --- | --- |
| PRDX3 | 0.011964928 |
| SCARA3 | 0.020822722 |
| SIRT2 | 0.024172789 |
| NUDT1 | 0.024256536 |
| PREX1 | 0.026791647 |
| PDLIM1 | 0.032987771 |
| SOD1 | 0.035553842 |
| OXR1 | 0.036618622 |
| PRDX1 | 0.036716157 |
| PXDN | 0.042308281 |
| OXSR1 | 0.05194646 |
| PTGR1 | 0.059641584 |
| NCOA7 | 0.059979307 |
| PTGS2 | 0.068453458 |
| PRDX4 | 0.077467038 |
| MB | 0.077910437 |
| SLC7A11 | 0.106262524 |
| GSTP1 | 0.114237581 |
| SOD2 | 0.120775765 |
| UCP2 | 0.121284438 |
| MPV17 | 0.122502091 |
| LHPP | 0.124080727 |
| GSTZ1 | 0.140144891 |
| GPX1 | 0.152754953 |
| CCL5 | 0.162194946 |
| ALB | 0.177179566 |
| STK25 | 0.185657634 |
| FOXM1 | 0.18885313 |
| CCS | 0.193093878 |
| GLA | 0.200917733 |
| SEPP1 | 0.202546489 |
| MSRA | 0.203942941 |
| GPX2 | 0.214756088 |
| MPO | 0.240411916 |
| PTGS1 | 0.260986945 |
| PNKP | 0.281347137 |
| TXN | 0.351624396 |
| GTF2I | 0.358509701 |
| NQO1 | 0.369672902 |
| NOS2 | 0.395552532 |
| NOX5 | 0.406518471 |
| MGST3 | 0.412712507 |
| ATOX1 | 0.445148622 |
| SQSTM1 | 0.467311962 |
| HSPA1A | 0.485635725 |
| DUSP1 | 1.835936326 |
| DHCR24 | 2.215743054 |
| BNIP3 | 2.662828906 |
| AKR1C2 | 3.86263309 |
| GCLM | 4.169651097 |
| TXNRD1 | 4.28066585 |
| BAG2 | 129.6643702 |
| APOE | 157.5403303 |
